# Supplementary material
Source: MDPI journal article supplement (https://www.mdpi.com/1999-4907/13/10/1651)
Supplement: s1 [file s1]

## Supplementary Materials

**Figure S1.** Variation of species production in relation to fir diameter (a) and in relation to beech age (b); variation of average MAI growth in relation to fir diameter (c) and beech age (d). Mixed stands located in high quality sites with a soil trophicity level (T (i.e., TI)) between 81–100 and 101–120 were considered. The variation curves indicate values of V and the increase of MAI per hectare under the assumption of 100% density.

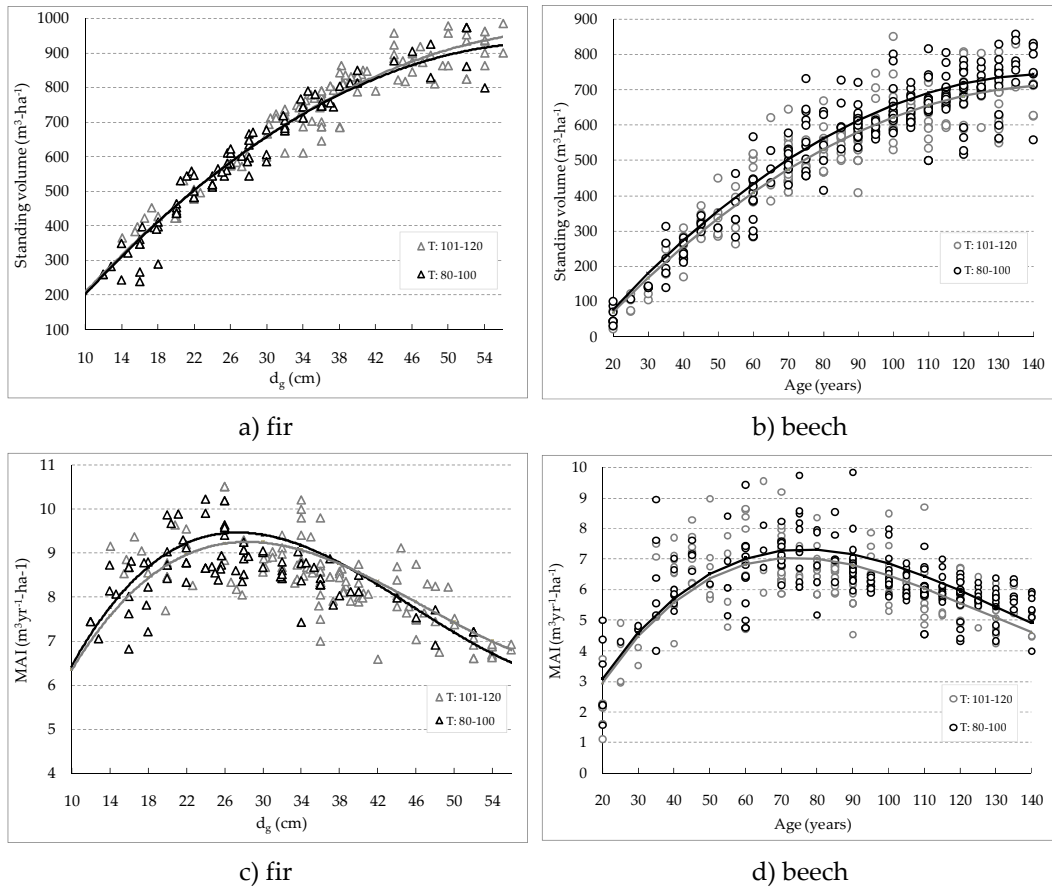

**Figure S2** Variation of mean height ( $h_g$ ) in relation to mixed stands age: fir (a) and beech (b); variation of dominant height ( $h_{dom}$ ) in relation to diameter: fir (c) and beech (d). Values of the stand's height located on soils with a high trophicity level (81–100 and 101–120).

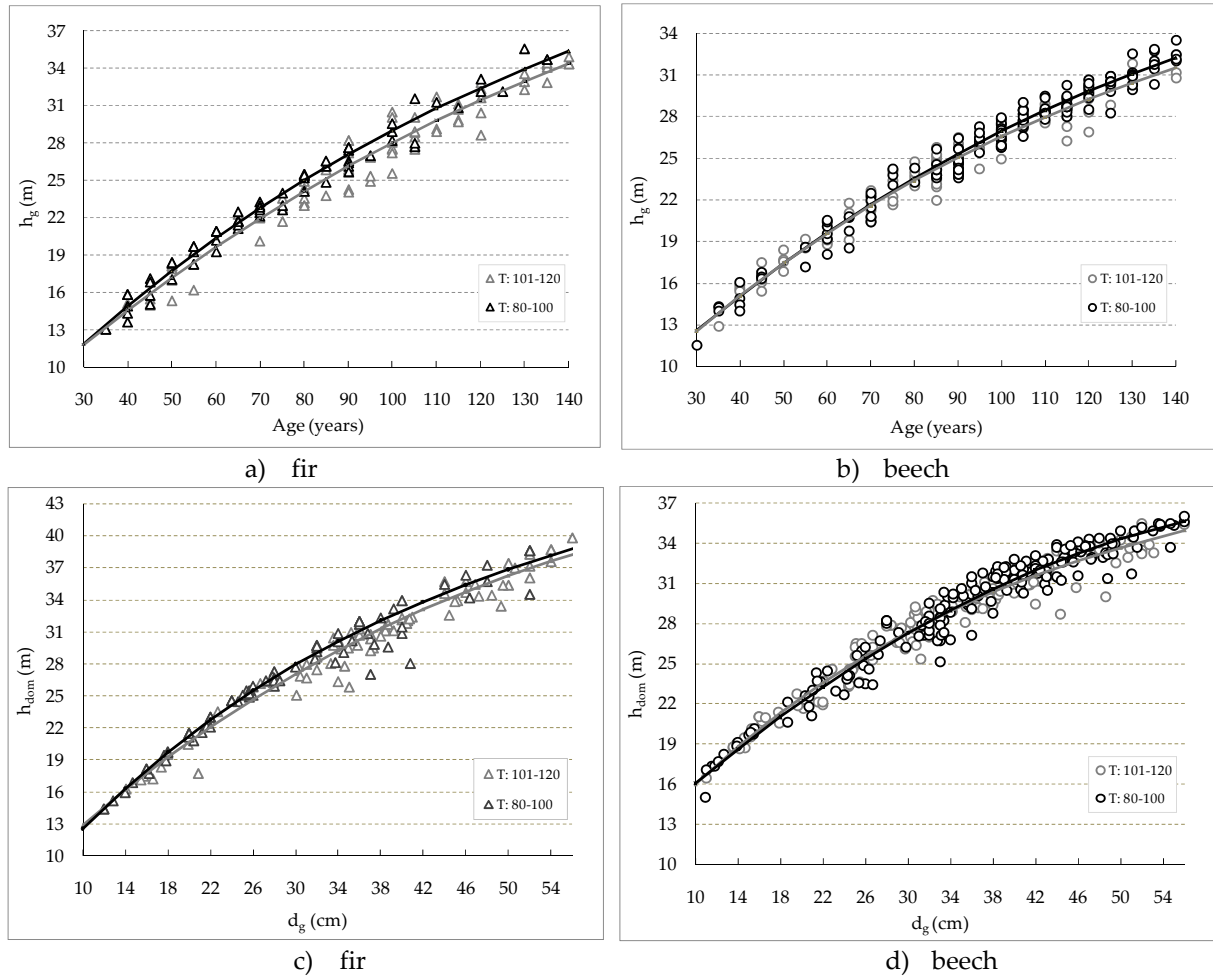

**Table S1** Statistical parameters of the models used in the relationship between soil trophicity and stand productivity

| Species | Variable                                                   |             | Equation |         |        |       |                        |                       | R <sup>2</sup> | RMSE  | MAE   | MAPE  | F <sub>exp</sub> | F <sub>teo</sub> |
|---------|------------------------------------------------------------|-------------|----------|---------|--------|-------|------------------------|-----------------------|----------------|-------|-------|-------|------------------|------------------|
|         | y                                                          | x           | Number   | TI      | a      | b     | c                      | d                     |                |       |       |       |                  |                  |
| Fir     | h <sub>g</sub> (m)                                         | Age (years) | (1)      | 80–100  | 1.397  | 0.388 | 13.19x10 <sup>-1</sup> | 0.2x10 <sup>-6</sup>  | 0.986          | 0.762 | 0.608 | 0.027 | 0.82             | 1.46             |
|         |                                                            |             | (2)      | 101–120 | 2.539  | 0.335 | 8.8x10 <sup>-4</sup>   | 0.8x10 <sup>-7</sup>  | 0.962          | 1.152 | 0.931 | 0.038 |                  |                  |
| Beech   |                                                            |             | (3)      | 80–100  | 3.953  | 0.314 | 9.4x10 <sup>-4</sup>   | 0.1x10 <sup>-6</sup>  | 0.974          | 0.767 | 0.601 | 0.024 | 1.19             | 1.35             |
|         |                                                            |             | (4)      | 101–120 | 3.578  | 0.334 | 12.4x10 <sup>-4</sup>  | 0.2x10 <sup>-6</sup>  | 0.961          | 0.860 | 0.702 | 0.029 |                  |                  |
| Fir     | h <sub>dom</sub> (m)                                       | d(cm)       | (5)      | 80–100  | 1.050  | 1.031 | -0.016                 | 8.6x10 <sup>-5</sup>  | 0.974          | 1.173 | 0.708 | 0.025 | 1.10             | 1.45             |
|         |                                                            |             | (6)      | 101–120 | 3.449  | 1.031 | -0.009                 | 0.3x10 <sup>-5</sup>  | 0.977          | 1.172 | 0.908 | 0.032 |                  |                  |
| Beech   |                                                            |             | (7)      | 80–100  | 7.444  | 0.964 | 0.0118                 | 0.6x10 <sup>-5</sup>  | 0.959          | 0.931 | 0.733 | 0.026 | 1.13             | 1.36             |
|         |                                                            |             | (8)      | 101–120 | 8.918  | 0.763 | 0.005                  | 0.2x10 <sup>-6</sup>  | 0.955          | 0.991 | 0.770 | 0.027 |                  |                  |
| Fir     | V (m <sup>3</sup> ha <sup>-1</sup> )                       | d(cm)       | (9)      | 80–100  | -104.7 | 33.60 | -0.272                 | -                     | 0.964          | 40.51 | 29.92 | 0.059 | 0.71             | 1.44             |
|         |                                                            |             | (10)     | 101–120 | -89.37 | 32.34 | -0.247                 | -                     | 0.957          | 42.03 | 33.87 | 0.048 |                  |                  |
| Beech   |                                                            | Age (years) | (11)     | 80–100  | -151.3 | 12.29 | -0.0421                | -                     | 0.902          | 65.00 | 48.60 | 0.112 | 1.08             | 1.25             |
|         |                                                            |             | (12)     | 101–120 | -144.4 | 11.57 | -0.0395                | -                     | 0.912          | 60.54 | 42.83 | 0.118 |                  |                  |
| Fir     | MAI<br>(m <sup>3</sup> yr <sup>-1</sup> ha <sup>-1</sup> ) | d(cm)       | (13)     | 80–100  | 1.377  | 0.651 | -0.0165                | 11.8x10 <sup>-5</sup> | 0.757          | 0.651 | 0.532 | 0.064 | 1.15             | 1.42             |
|         |                                                            |             | (14)     | 101–120 | 0.925  | 0.728 | -0.0190                | 13.9x10 <sup>-5</sup> | 0.851          | 0.661 | 0.563 | 0.069 |                  |                  |
| Beech   |                                                            | Age (years) | (15)     | 80–100  | -1.138 | 0.256 | 23.6x10 <sup>-4</sup>  | 0.6x10 <sup>-6</sup>  | 0.752          | 0.923 | 0.754 | 0.143 | 1.05             | 1.25             |
|         |                                                            |             | (16)     | 101–120 | -1.425 | 0.268 | -0.0026                | 7.1x10 <sup>-6</sup>  | 0.752          | 0.871 | 0.638 | 0.107 |                  |                  |
